# Supplementary material for: Correlating MOF-808 parameters with mixed-matrix membrane (MMM) CO2 permeation for a more rational MMM development
Source: Royal Society of Chemistry journal article supplement (doi:10.1039/d0ta10207e), 2021-01-01
Supplement: d0ta10207e1.pdf [file d0ta10207e1.pdf]

1 **1 Supporting information**

2 **Correlation of MOF-808 parameters to mixed-**  
3 **matrix membrane CO<sub>2</sub> permeation behavior**

4 *Raymond Thür<sup>a</sup>, Daan Van Havere<sup>a</sup>, Niels Van Velthoven<sup>a</sup>, Simon Smolders<sup>a</sup>, Aran Lamaire<sup>b</sup>, Jelle Wieme<sup>b</sup>,*  
5 *Veronique Van Speybroeck<sup>b</sup>, Dirk De Vos<sup>a</sup>, Ivo F.J. Vankelecom<sup>a</sup>*

6 <sup>a</sup>Centre for Membrane Separations, Adsorption, Catalysis and Spectroscopy for Sustainable Solutions  
7 (cMACS), KU Leuven, Celestijnenlaan 200F, Box 2454, 3001 Heverlee, Belgium

8 <sup>b</sup>Center for Molecular Modeling, Ghent University, Tech Lane Ghent Science Park, Campus A,  
9 Technologiepark 46, 9052 Zwijnaarde, Belgium

10 E-mail: [ivo.vankelecom@kuleuven.be](mailto:ivo.vankelecom@kuleuven.be)

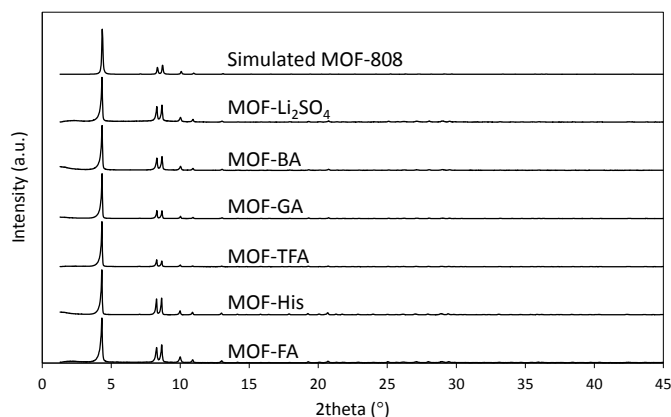

11

12 Figure S1: XRD patterns of all MOF samples.

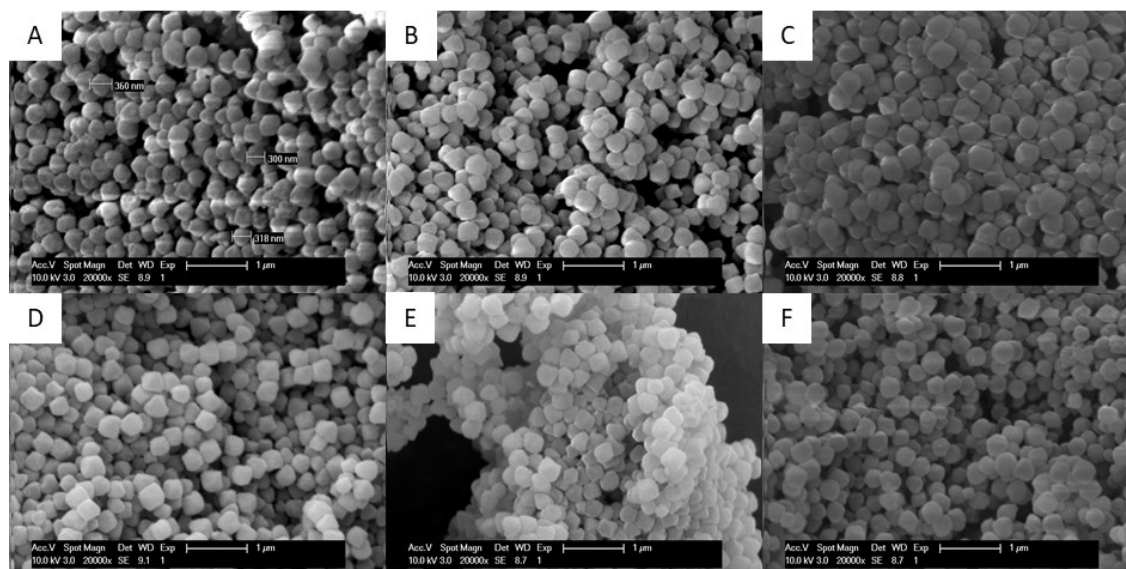

13

14 Figure S2: SEM images of all MOF particles: (A) MOF-FA, (B) MOF-GA, (C) MOF-His, (D) MOF-BA, (E) MOF-TFA and  
 15 (F) MOF-Li<sub>2</sub>SO<sub>4</sub>.

16 Table S1: Average size of all MOFs calculated after ImageJ analysis. 30 samples were measured per MOF.

|                                     | Number | Average size (nm) | Variance |
|-------------------------------------|--------|-------------------|----------|
| MOF-BA                              | 30     | 362.7             | 2132.1   |
| MOF-FA                              | 30     | 346.6             | 1080.2   |
| MOF-GA                              | 30     | 352.1             | 813.32   |
| MOF-His                             | 30     | 355.5             | 1786.3   |
| MOF-Li <sub>2</sub> SO <sub>4</sub> | 30     | 336.7             | 1131.8   |
| MOF-TFA                             | 30     | 347.8             | 914.24   |

17

18 Table S2: ANOVA analysis of the MOF particle sizes. As the p-value is larger than the significance level (0.05), no statistically  
 19 significant difference in size exists between the samples.

| Source of Variation | SS      | ANOVA |      |        | p-value | F crit |
|---------------------|---------|-------|------|--------|---------|--------|
|                     |         | df    | MS   | F      |         |        |
| Between Groups      | 11680.1 | 5     | 2336 | 1.7837 | 0.1185  | 2.2661 |
| Within Groups       | 227882  | 174   | 1310 |        |         |        |
| Total               | 239562  | 179   |      |        |         |        |

20

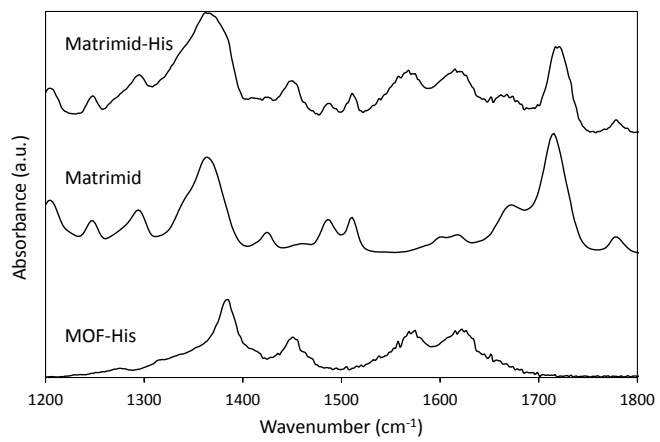

21

22 Figure S3: ATR-FTIR spectrum of MMM-His, Matrimid and MOF-His.

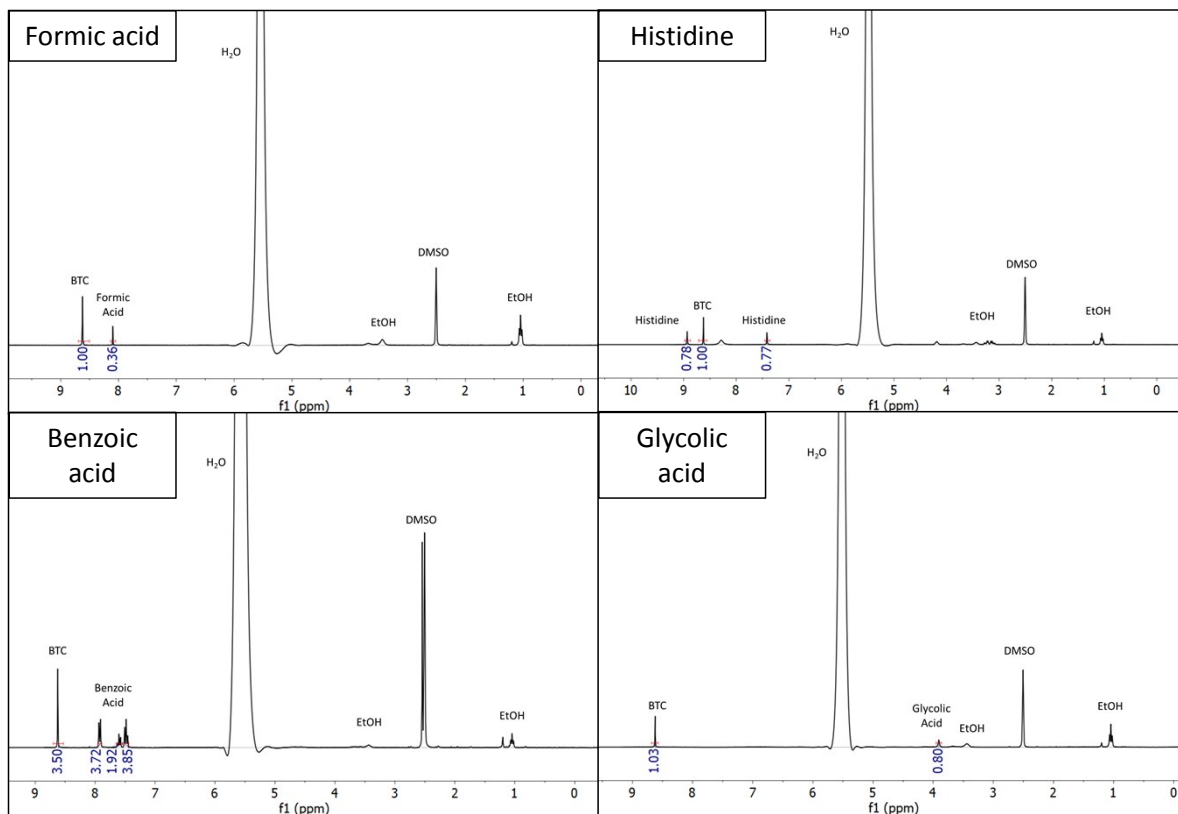

23

24 Figure S4:  $^1\text{H-NMR}$  spectra for MOF-FA, MOF-BA, MOF-His and MOF-GA.

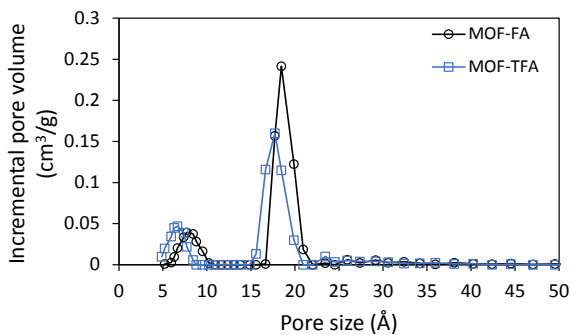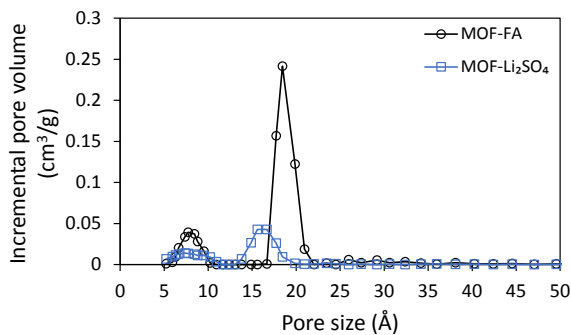

25

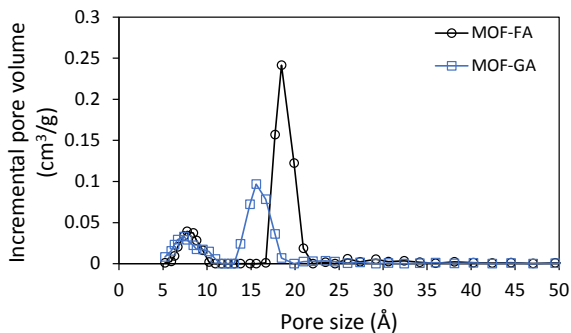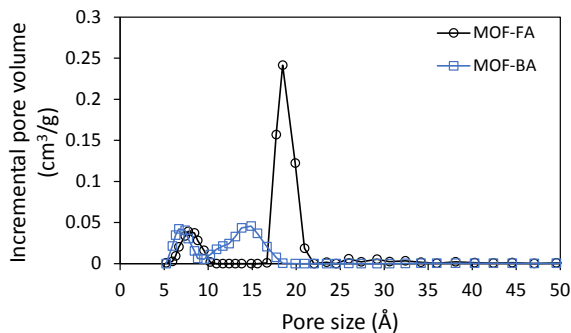

26

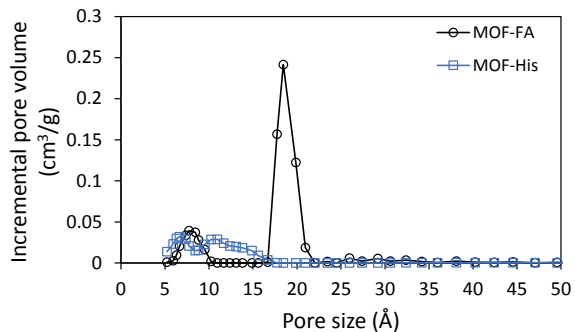

27

28 Figure S5: Incremental pore volume as a function of pore size for all MOFs.

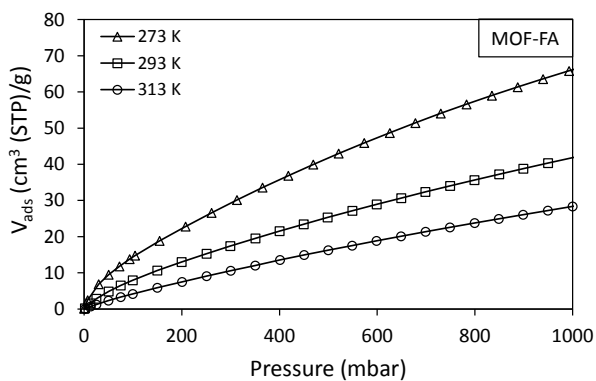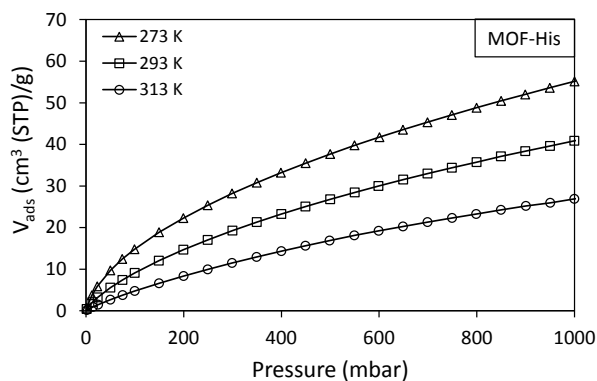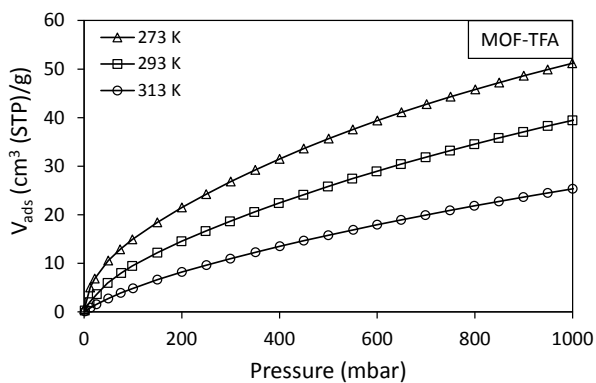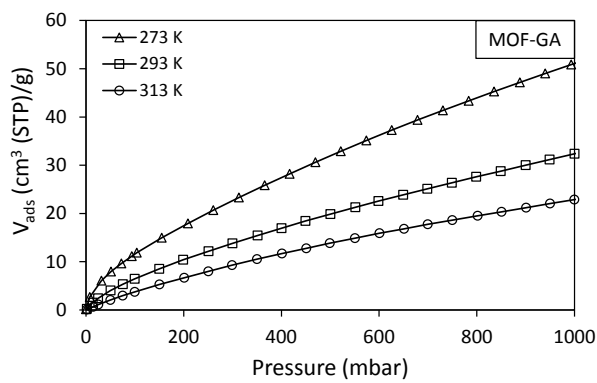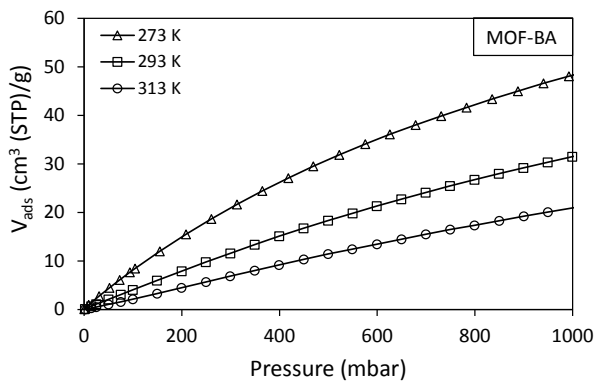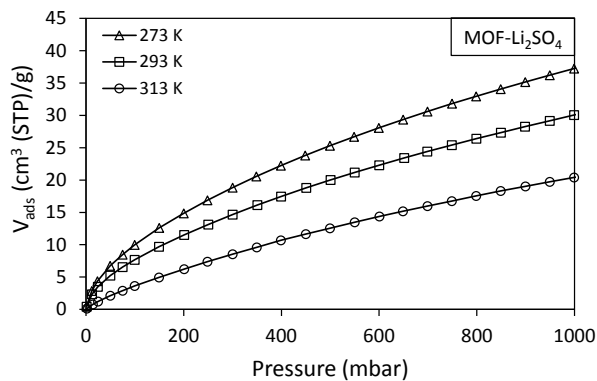

29

30 Figure S6: CO<sub>2</sub> uptake of all MOFs at 273 K, 293 K and 313 K.

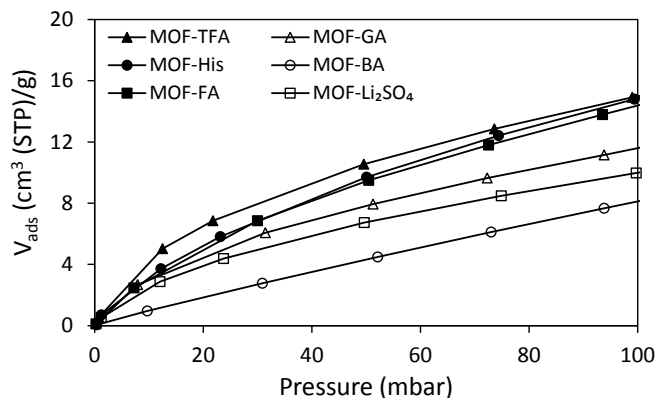

31

32 Figure S7: CO<sub>2</sub> adsorption isotherms of all MOFs in the low-pressure region (0-100 mbar) at 273 K.

33 Table S3: Model parameters for the dual-site Langmuir fit on the CO<sub>2</sub> adsorption isotherm at 273 K. N is the amount of adsorbed  
 34 gas (cm<sup>3</sup> (STP)/g), N<sub>m,A</sub> and N<sub>m,B</sub> the amount of adsorbed gas at saturation for sorption site A and B, respectively (cm<sup>3</sup> (STP)/g) and  
 35 b<sub>A</sub> and b<sub>B</sub> the adsorption equilibrium constants for, respectively, sorption site A and B. R<sup>2</sup> is the correlation coefficient.

|                                     | N <sub>m,A</sub> | N <sub>m,B</sub> | b <sub>A</sub> | b <sub>B</sub> | R <sup>2</sup> |
|-------------------------------------|------------------|------------------|----------------|----------------|----------------|
| MOF-FA                              | 0.34             | 8.74             | 0.046          | 0.00042        | 1.0000         |
| MOF-GA                              | 0.32             | 8.14             | 0.048          | 0.00031        | 1.0000         |
| MOF-BA                              | 0.04             | 4.95             | 0.014          | 0.00073        | 1.0000         |
| MOF-TFA                             | 0.43             | 4.44             | 0.056          | 0.00070        | 1.0000         |
| MOF-His                             | 0.59             | 5.59             | 0.020          | 0.00050        | 0.9999         |
| MOF-Li <sub>2</sub> SO <sub>4</sub> | 0.35             | 3.87             | 0.028          | 0.00051        | 0.9999         |

36

37 Table S4: CO<sub>2</sub> Q<sub>st</sub> (kJ/mol) of all MOFs for different CO<sub>2</sub> loadings (0, 5, 15, 30 cm<sup>3</sup> (STP)/g).

|                                     | CO <sub>2</sub> adsorbed (cm <sup>3</sup> (STP)/g) |      |      |      |
|-------------------------------------|----------------------------------------------------|------|------|------|
|                                     | 0                                                  | 5    | 15   | 30   |
| MOF-FA                              | 30.9                                               | 34.1 | 25.6 | 22.1 |
| MOF-His                             | 31.8                                               | 30.1 | 25.6 | 22.4 |
| MOF-TFA                             | 39.2                                               | 37.2 | 27.7 | 22.5 |
| MOF-GA                              | 37.6                                               | 32.9 | 22.6 | 21.4 |
| MOF-BA                              | 23.9                                               | 22.8 | 21.8 | 20.7 |
| MOF-Li <sub>2</sub> SO <sub>4</sub> | 28.2                                               | 28.0 | 20.3 | 18.3 |

38 Table S5: Solubility (S) of CO<sub>2</sub> and N<sub>2</sub> in the Matrimid reference membrane and the MMMs. S<sub>CO<sub>2</sub>/S<sub>N<sub>2</sub></sub> constitutes the CO<sub>2</sub>/N<sub>2</sub>  
 39 solubility selectivity. Measurements were conducted at 30 °C and varying pressures (see table).</sub>

40

41

42

43

44

45

| Pressure (bar) | Membrane | S <sub>N<sub>2</sub></sub> | S <sub>CO<sub>2</sub></sub> | S <sub>CO<sub>2</sub>/S<sub>N<sub>2</sub></sub></sub> |
|----------------|----------|----------------------------|-----------------------------|-------------------------------------------------------|
|----------------|----------|----------------------------|-----------------------------|-------------------------------------------------------|

|    |                                     |         |         |      |
|----|-------------------------------------|---------|---------|------|
| 5  | Matrimid                            | 0.00703 | 0.08125 | 11.6 |
|    | MMM-GA                              | 0.00788 | 0.09487 | 12.0 |
|    | MMM-His                             | 0.00809 | 0.10152 | 12.5 |
|    | MMM-FA                              | 0.00694 | 0.10454 | 15.1 |
|    | MMM-BA                              | 0.00578 | 0.10036 | 17.4 |
|    | MMM-TFA                             | 0.00609 | 0.10828 | 17.8 |
|    | MMM-Li <sub>2</sub> SO <sub>4</sub> | 0.00592 | 0.10901 | 18.4 |
| 10 | Matrimid                            | 0.00594 | 0.05615 | 9.45 |
|    | MMM-GA                              | 0.00675 | 0.06699 | 9.92 |
|    | MMM-His                             | 0.00692 | 0.06833 | 9.87 |
|    | MMM-FA                              | 0.00586 | 0.07399 | 12.6 |
|    | MMM-BA                              | 0.00571 | 0.06989 | 12.2 |
|    | MMM-TFA                             | 0.00524 | 0.07603 | 14.5 |
|    | MMM-Li <sub>2</sub> SO <sub>4</sub> | 0.00536 | 0.07594 | 14.2 |
| 15 | Matrimid                            | 0.00537 | 0.04539 | 8.46 |
|    | MMM-GA                              | 0.00637 | 0.05398 | 8.46 |
|    | MMM-His                             | 0.00611 | 0.05410 | 8.85 |
|    | MMM-FA                              | 0.00515 | 0.06053 | 11.8 |
|    | MMM-BA                              | 0.00529 | 0.05572 | 10.5 |
|    | MMM-TFA                             | 0.00454 | 0.06277 | 13.8 |
|    | MMM-Li <sub>2</sub> SO <sub>4</sub> | 0.00472 | 0.06062 | 12.9 |

46

#### 47 Force fields

48 To perform static GCMC (Grand Canonical Monte Carlo) simulations for the differently functionalized  
 49 MOF-808 structures, each structure was parametrized by a non-covalent force field that contains both  
 50 electrostatic and van der Waals interactions:

$$51 \quad V = V_{ei} + V_{vdW} \quad \text{(Equation 8)}$$

52 The electrostatic interactions are modelled by a Coulomb interaction between Gaussian charge  
 53 distributions, which are derived from cluster models of the MOF-808 Zr<sub>6</sub>O<sub>8</sub>H<sub>x</sub> brick, using phenyl  
 54 terminations at the positions of the six BTC<sup>3-</sup> linkers (Figure S8). After a geometry optimization with  
 55 Gaussian 16<sup>82</sup>, using the B3LYP functional<sup>83</sup> and 6-311g(d,p) basis sets<sup>84</sup> for all atoms but zirconium, for  
 56 which the LanL2DZ basis set and pseudopotential are used<sup>85</sup>, the electron density of the cluster is  
 57 determined with gpaw<sup>86</sup> using the PBE functional<sup>33</sup>. Finally, the atomic charges q<sub>i</sub> are derived with the  
 58 Minimal Basis Iterative Stockholder (MBIS) partitioning scheme<sup>87</sup>, so that the electrostatic interaction is  
 59 given by

$$60 \quad V_{ei} = \frac{1}{2} \sum_{\substack{ij=1 \\ (i \neq j)}} \frac{q_i q_j}{4\pi\epsilon_0 r_{ij}} \operatorname{erf} \left( \frac{r_{ij}}{d_{ij}} \right) \quad \text{(Equation 9)}$$

61 with  $r_{ij}$  the distance between atoms  $i$  and  $j$ , and  $q_i$  and  $d_i$  respectively the total charge and the radius of  
 62 the Gaussian charge distribution<sup>88</sup> centered on atom  $i$ . The mixed radius  $d_{ij}$  of the Gaussian charges is  
 63 given by  $\sqrt{d_i^2 + d_j^2}$ .

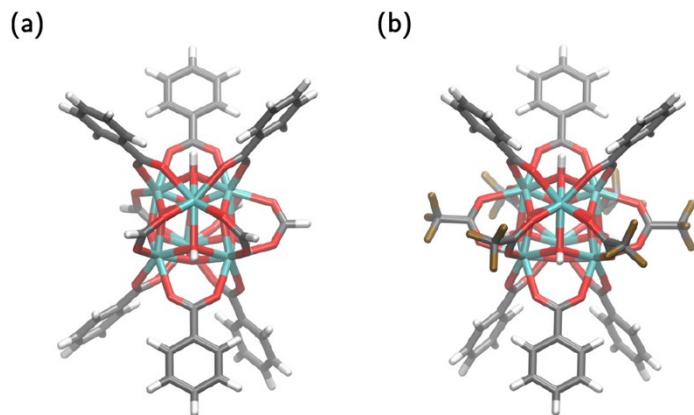

64

65 Figure S8: Cluster models used in the derivation of the atomic charges of (a) MOF-FA-def1 and (b) MOF-TFA.

66 The van der Waals interactions are modelled by a Lennard-Jones potential:

$$67 \quad V_{vdW} = \sum_{i < j} 4\epsilon_{ij} \left[ \left( \frac{\sigma_{ij}}{r_{ij}} \right)^{12} - \left( \frac{\sigma_{ij}}{r_{ij}} \right)^6 \right] \quad \text{(Equation 10)}$$

68 for which the parameters  $\sigma_{ij}$  and  $\epsilon_{ij}$  between atom  $i$  and  $j$  are derived from the atomic DREIDING  
 69 parameters<sup>41</sup> (and UFF parameters<sup>43</sup> for zirconium), using the Lorentz-Berthelot mixing rules:

$$70 \quad \sigma_{ij} = \frac{\sigma_i + \sigma_j}{2} \quad \text{and} \quad \epsilon_{ij} = \sqrt{\epsilon_i \epsilon_j} \quad \text{(Equation 11)}$$

71 In the GCMC simulations, the Lennard-Jones interactions are truncated at 10.1 Å and complemented by  
 72 the appropriate tail corrections.

### 73 Modelled CO<sub>2</sub> isotherms

74 The CO<sub>2</sub> adsorption isotherms obtained from GCMC simulations at different pressures for MOF-FA and  
 75 MOF-TFA are given in Figure S9. The isotherms for both MOF-FA and MOF-TFA are similar to the  
 76 experimental ones, although small differences can be observed. These can be attributed to the different  
 77 number of modulator molecules on the zirconium cluster and the slightly higher temperature at which  
 78 CO<sub>2</sub> adsorption was simulated. For MOF-FA, two defect structures with, respectively, one and three  
 79 missing formate groups per zirconium cluster are modelled next to the pristine MOF-FA (containing six  
 80 formate groups per cluster). The absolute differences (i.e. the number of adsorbed CO<sub>2</sub> molecules per unit  
 81 cell) between the pristine and defects structures are small and only significant at higher pressures.



82 However, per unit of mass, this results in a slightly larger uptake for MOF-FA with three defects in  
83 comparison to pristine MOF-FA.

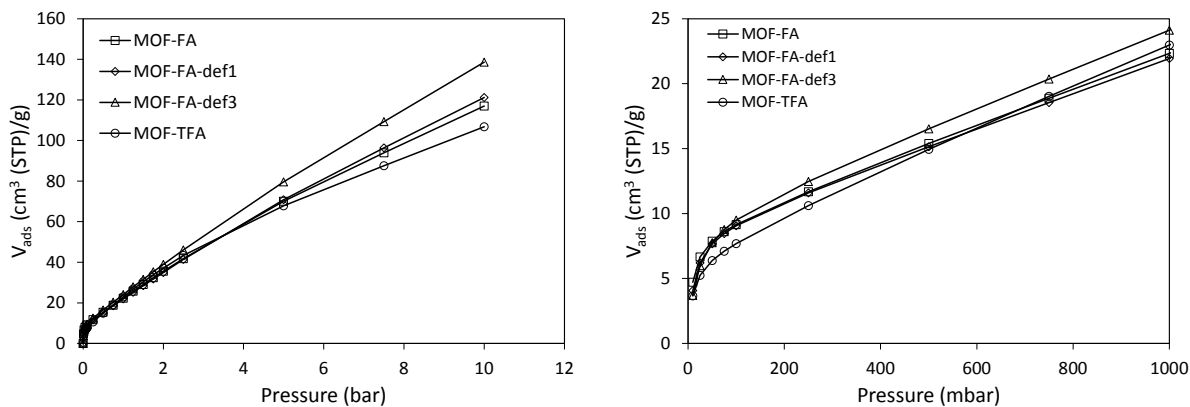

84

85 Figure S9: Modelled CO<sub>2</sub> adsorption isotherms for MOF-FA and MOF-TFA. For MOF-FA, the number of defects (i.e. absence of  
86 formate molecule) on the zirconium clusters has been varied from one (MOF-FA-def1) to three (MOF-FA-def3).

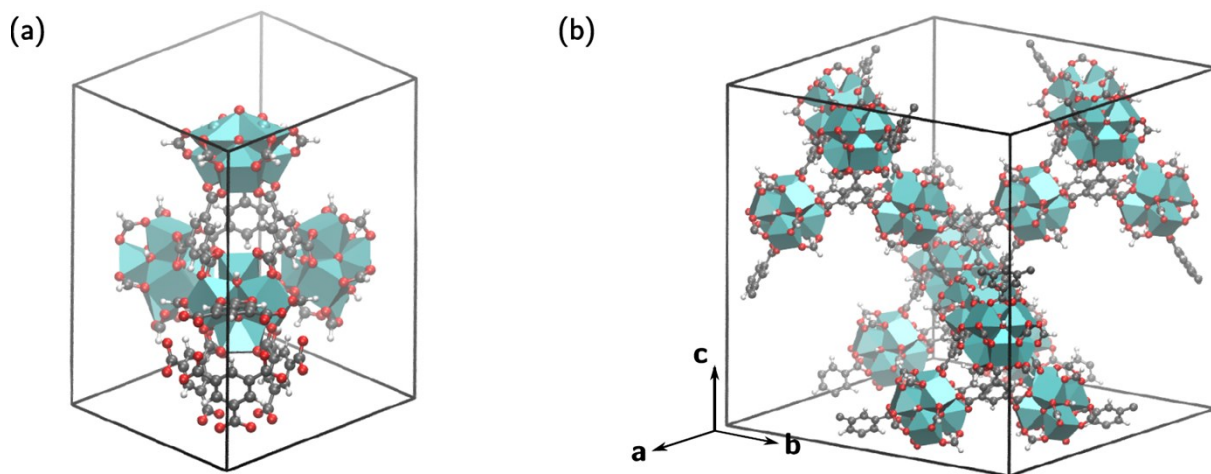

87

88 Figure S10: (a) Primitive unit cell of MOF-FA. (b) Conventional cubic unit cell of MOF-FA.

89 The CO<sub>2</sub> density in MOF-FA-def1 exhibits only small differences in comparison with the pristine MOF-FA.  
90 MOF-FA-def3, on the other hand, does show some interesting differences (Figure S10). Similar to MOF-  
91 FA, the CO<sub>2</sub> molecules are first adsorbed in the cages of the linkers, yielding a square grid of adsorption  
92 sites when viewing MOF-808 along the c-axis. The second type of adsorption sites, covering the open sides  
93 of the linkers, become more prominently occupied with increasing pressure, but do not longer give rise  
94 to a square grid of adsorption sites. This is due to the fact that an additional type of adsorption sites is  
95 present in MOF-FA-def3, located on the open metal sites of the zirconium clusters (marked as site 3 in  
96 Figure S10). These adsorption sites are observed to be more favorable than the adsorption sites located  
97 at the linkers. With increasing pressure the MOF-808 structure exhibits a different encapsulation, which

98 is primarily formed by the adsorption sites at the open metal sites and the adsorption sites at the open  
 99 sides of the linkers. The adsorption sites above the benzene rings of the linkers are not as significantly  
 100 occupied as in pristine MOF-FA, not even at the highest pressures.

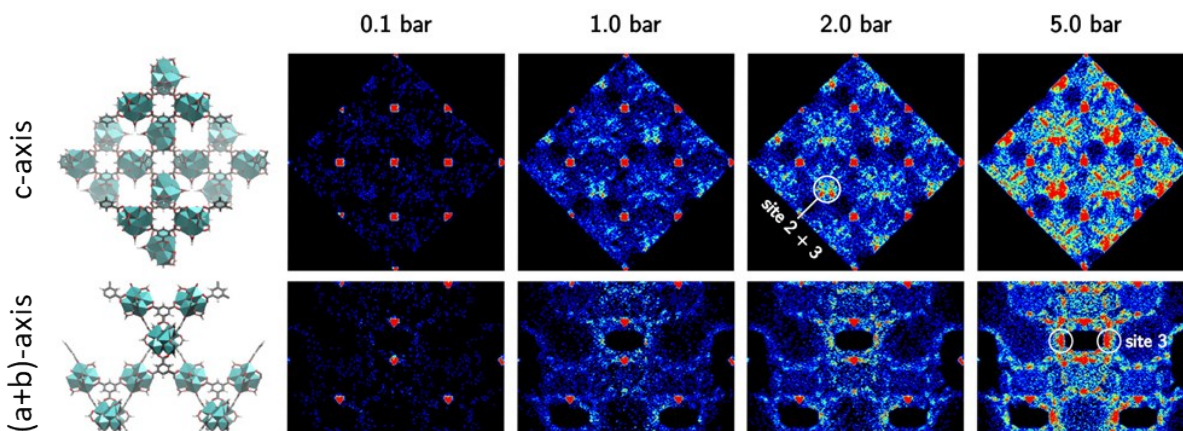

101

102 Figure S11: Density of the adsorbed CO<sub>2</sub> molecules in MOF-FA-def3 at 300 K projected on a plane orthogonal to the c-axis and  
 103 the (a + b)-axis of the conventional unit cell. The CO<sub>2</sub> molecules are represented by the positions of the carbon atoms.

104 Table S6: Simulated adsorption enthalpies for MOF-FA, MOF-TFA and MOF-FA with 1 and 3 defect(s), respectively.

| Pressure (bar) | MOF-FA | MOF-FA-def1 | MOF-FA-def3 | MOF-TFA |
|----------------|--------|-------------|-------------|---------|
| 0.010          | -45.2  | -43.7       | -41.2       | -44.8   |
| 0.025          | -41.6  | -41.2       | -39.2       | -40.6   |
| 0.050          | -35.2  | -36.2       | -35.3       | -34.3   |
| 0.075          | -30.1  | -31.8       | -31.7       | -30.3   |
| 0.10           | -26.8  | -28.5       | -28.8       | -27.9   |
| 0.25           | -20.5  | -21.0       | -21.5       | -23.9   |
| 0.50           | -19.1  | -19.0       | -19.4       | -23.1   |
| 0.75           | -18.7  | -18.6       | -18.9       | -22.9   |
| 1.00           | -18.6  | -18.4       | -18.7       | -22.8   |
| 1.25           | -18.4  | -18.3       | -18.6       | -22.7   |
| 1.50           | -18.4  | -18.2       | -18.5       | -22.6   |
| 1.75           | -18.3  | -18.2       | -18.4       | -22.5   |
| 2.00           | -18.2  | -18.1       | -18.4       | -22.4   |
| 2.50           | -18.1  | -18.0       | -18.3       | -22.1   |
| 5.00           | -17.4  | -17.5       | -17.9       | -20.7   |
| 7.50           | -16.9  | -17.0       | -17.5       | -19.4   |
| 10.0           | -16.5  | -16.6       | -17.1       | -18.6   |

105

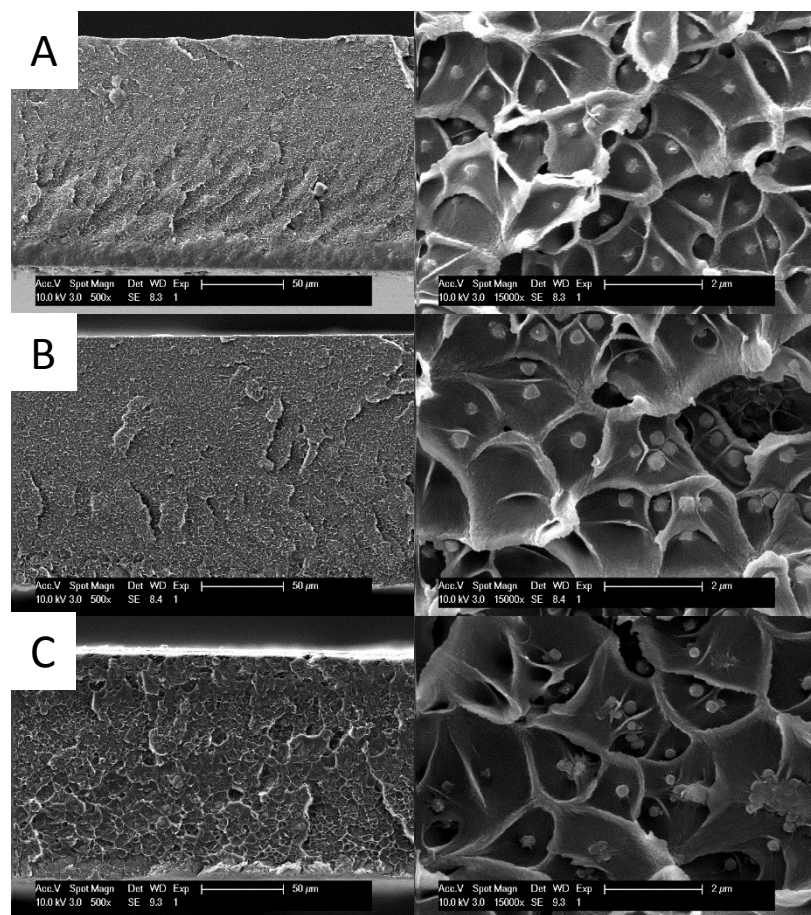

106

107 Figure S12: SEM cross-sections of A) MMM-FA, B) MMM-BA and C) MMM-TFA. All MMMs contain 10 wt.% MOF.

108

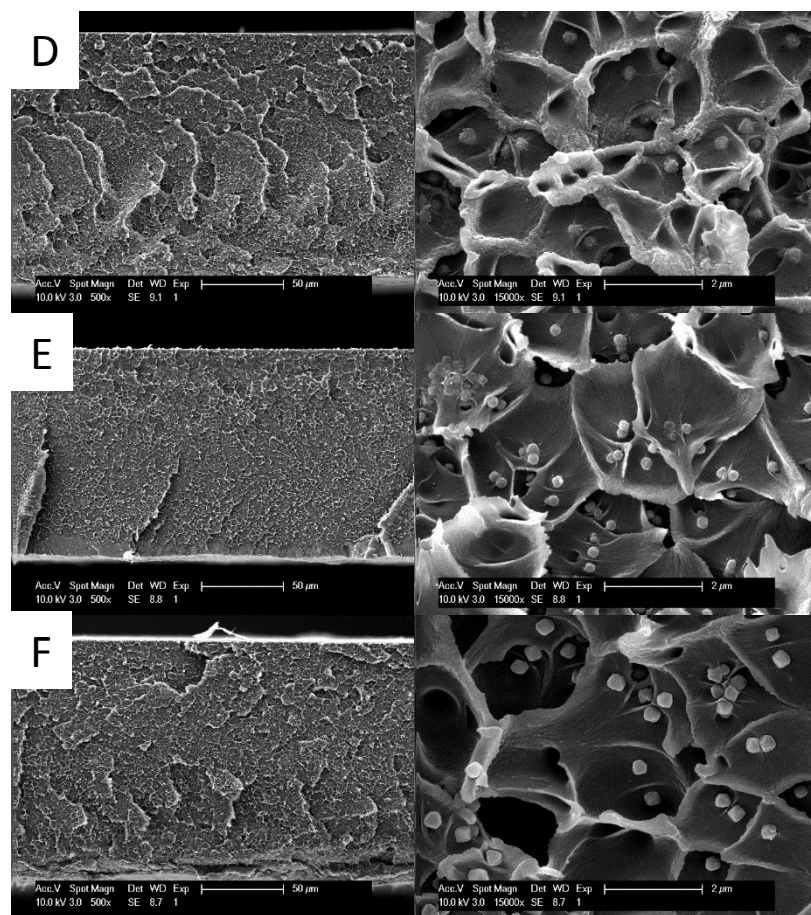

109

110 Figure S13: SEM cross-sections of D) MMM-GA, E) MMM-His and F) MMM-Li<sub>2</sub>SO<sub>4</sub>. All MMMs contain 10 wt.% MOF.

111

112 Table S7: Thermal analysis of all membranes.

|                                         | <b>Glass transition<br/>temperature (T<sub>g</sub>,<br/>°C)</b> | <b>Decomposition<br/>temperature (T<sub>d</sub>,<br/>°C)</b> | <b>Weight % MOF<br/>according to TGA</b> |
|-----------------------------------------|-----------------------------------------------------------------|--------------------------------------------------------------|------------------------------------------|
| Matrimid                                | 312                                                             | 555                                                          | -                                        |
| MMM-FA                                  | 324                                                             | 548                                                          | 10                                       |
| MMM-GA                                  | 320                                                             | 547                                                          | 9                                        |
| MMM-BA                                  | 322                                                             | 550                                                          | 8                                        |
| MMM-His                                 | 322                                                             | 553                                                          | 8                                        |
| MMM-TFA                                 | 320                                                             | 552                                                          | 8                                        |
| MMM-<br>Li <sub>2</sub> SO <sub>4</sub> | 322                                                             | -                                                            | -                                        |

113

114

115

116

117

118

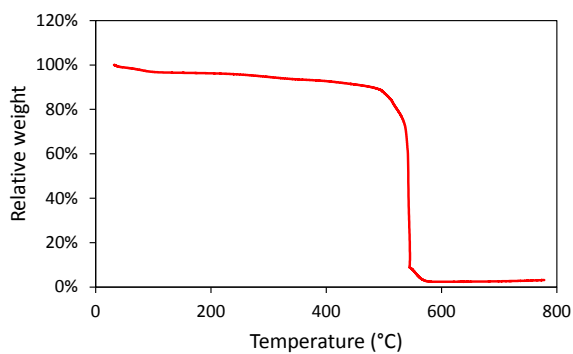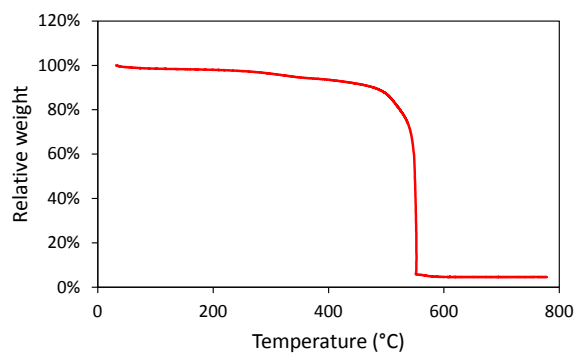

119

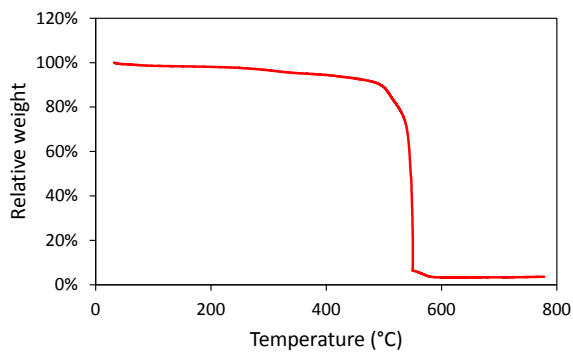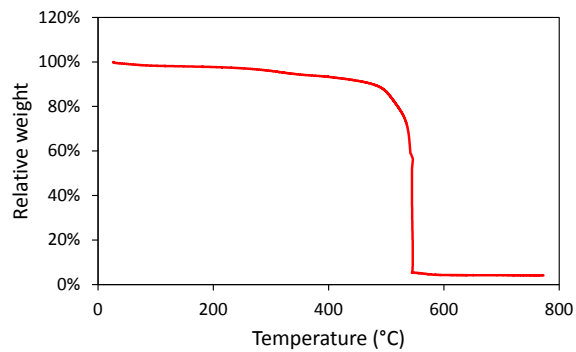

120

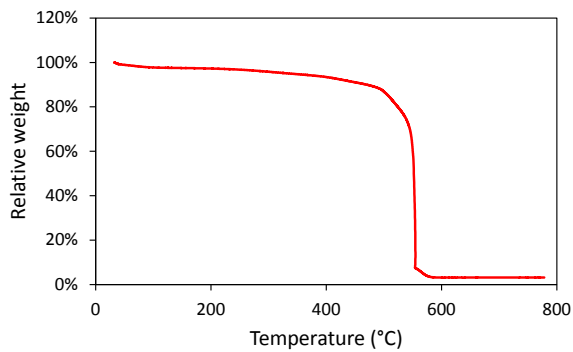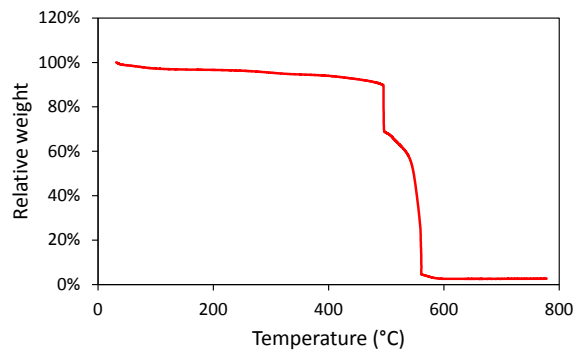

121

122 Figure S14: TGA traces of MMM-FA (top left), MMM-TFA (top right), MMM-BA (middle left), MMM-GA (middle right), MMM-His  
123 (bottom left) and MMM-Li<sub>2</sub>SO<sub>4</sub> (bottom right).

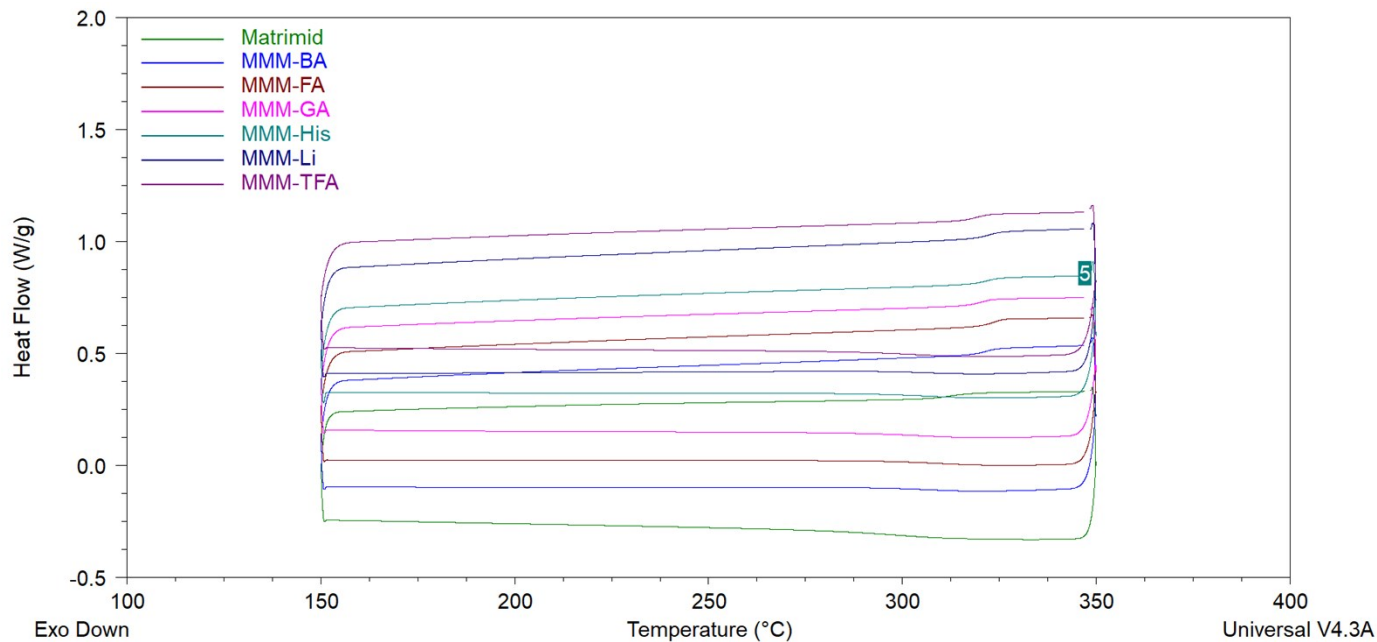

124

125 Figure S15: DSC traces of all MMMs and Matrimid.

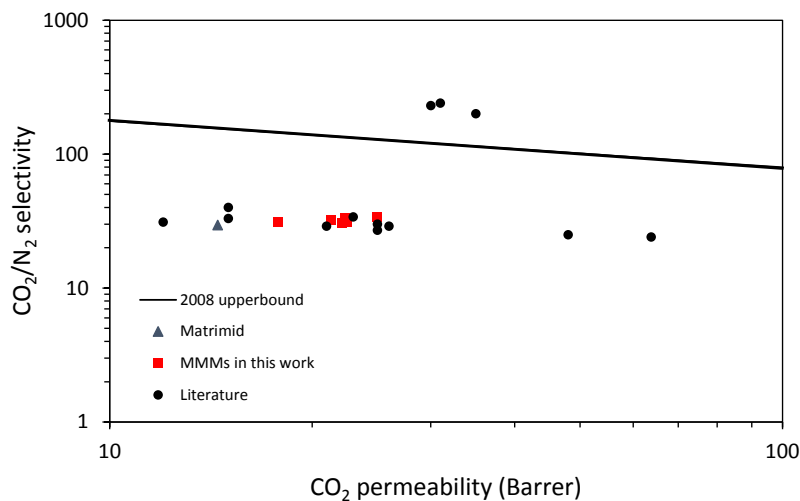

126

127 Figure S16: Comparison of the performance of the MMMs produced in this work with literature<sup>76,89-92</sup> and the 2008 Robeson  
 128 CO<sub>2</sub>/N<sub>2</sub> upper bound.

129

130

131

132

133

134

135

136 Table S8: Correlation factors between MOF parameters.

|       | Correlation of MOF parameters      | 273 K                            |                                    | 293 K                            |                                    | 313 K                            |                                    | BET surface area | Pore volume | Q <sub>st,0</sub> | Q <sub>st,15</sub> | Q <sub>st,30</sub> |
|-------|------------------------------------|----------------------------------|------------------------------------|----------------------------------|------------------------------------|----------------------------------|------------------------------------|------------------|-------------|-------------------|--------------------|--------------------|
|       |                                    | CO <sub>2</sub> uptake (50 mbar) | CO <sub>2</sub> uptake (1000 mbar) | CO <sub>2</sub> uptake (50 mbar) | CO <sub>2</sub> uptake (1000 mbar) | CO <sub>2</sub> uptake (50 mbar) | CO <sub>2</sub> uptake (1000 mbar) |                  |             |                   |                    |                    |
| 273 K | CO <sub>2</sub> uptake (50 mbar)   | 1.00                             | 0.22                               | 0.85                             | 0.81                               | 0.95                             | 0.78                               | 0.54             | 0.50        | 0.77              | 0.86               | 0.67               |
|       | CO <sub>2</sub> uptake (1000 mbar) |                                  | 1.00                               | -0.25                            | 0.63                               | -0.09                            | 0.70                               | 0.82             | 0.83        | 0.03              | 0.53               | 0.66               |
| 293 K | CO <sub>2</sub> uptake (50 mbar)   |                                  |                                    | 1.00                             | 0.51                               | 0.96                             | 0.44                               | 0.17             | 0.10        | 0.61              | 0.54               | 0.21               |
|       | CO <sub>2</sub> uptake (1000 mbar) |                                  |                                    |                                  | 1.00                               | 0.64                             | 0.98                               | 0.64             | 0.61        | 0.36              | 0.92               | 0.83               |
| 313 K | CO <sub>2</sub> uptake (50 mbar)   |                                  |                                    |                                  |                                    | 1.00                             | 0.59                               | 0.29             | 0.24        | 0.73              | 0.69               | 0.43               |
|       | CO <sub>2</sub> uptake (1000 mbar) |                                  |                                    |                                  |                                    |                                  | 1.00                               | 0.69             | 0.66        | 0.36              | 0.85               | 0.81               |
|       | BET surface area                   |                                  |                                    |                                  |                                    |                                  |                                    | 1.00             | 0.99        | 0.45              | 0.67               | 0.61               |
|       | Pore volume                        |                                  |                                    |                                  |                                    |                                  |                                    |                  | 1.00        | 0.48              | 0.67               | 0.67               |
|       | Q <sub>st,0</sub>                  |                                  |                                    |                                  |                                    |                                  |                                    |                  |             | 1.00              | 0.59               | 0.53               |
|       | Q <sub>st,15</sub>                 |                                  |                                    |                                  |                                    |                                  |                                    |                  |             |                   | 1.00               | 0.90               |
|       | Q <sub>st,30</sub>                 |                                  |                                    |                                  |                                    |                                  |                                    |                  |             |                   |                    | 1.00               |

138 Table S9: Correlation factors between membrane parameters.

| <b>Correlation of membrane parameters</b> | $\alpha_{15/85}$ | $\alpha_{50/50}$ | $\alpha_{ideal}$ | $P_{15/85}$ | $P_{50/50}$ | $P_{100/0}$ | CO <sub>2</sub> uptake (1 bar) | CO <sub>2</sub> uptake (2 bar) | CO <sub>2</sub> uptake (3 bar) | CO <sub>2</sub> uptake (4 bar) | CO <sub>2</sub> uptake (5 bar) |
|-------------------------------------------|------------------|------------------|------------------|-------------|-------------|-------------|--------------------------------|--------------------------------|--------------------------------|--------------------------------|--------------------------------|
| $\alpha_{15/85}$                          | 1.00             | 0.89             | -0.97            | 0.58        | 0.74        | 0.55        | 0.42                           | 0.36                           | 0.38                           | 0.41                           | 0.39                           |
| $\alpha_{50/50}$                          |                  | 1.00             | -0.80            | 0.73        | 0.75        | 0.74        | 0.03                           | -0.05                          | -0.04                          | -0.01                          | -0.03                          |
| $\alpha_{ideal}$                          |                  |                  | 1.00             | -0.39       | -0.59       | -0.37       | -0.56                          | -0.49                          | -0.49                          | -0.52                          | -0.47                          |
| $P_{15/85}$                               |                  |                  |                  | 1.00        | 0.95        | 0.98        | -0.18                          | -0.21                          | -0.20                          | -0.20                          | -0.16                          |
| $P_{50/50}$                               |                  |                  |                  |             | 1.00        | 0.90        | 0.14                           | 0.11                           | 0.11                           | 0.10                           | 0.13                           |
| $P_{100/0}$                               |                  |                  |                  |             |             | 1.00        | -0.27                          | -0.33                          | -0.33                          | -0.34                          | -0.31                          |
| CO <sub>2</sub> uptake (1 bar)            |                  |                  |                  |             |             |             | 1.00                           | 0.98                           | 0.95                           | 0.92                           | 0.87                           |
| CO <sub>2</sub> uptake (2 bar)            |                  |                  |                  |             |             |             |                                | 1.00                           | 0.99                           | 0.97                           | 0.94                           |
| CO <sub>2</sub> uptake (3 bar)            |                  |                  |                  |             |             |             |                                |                                | 1.00                           | 1.00                           | 0.98                           |
| CO <sub>2</sub> uptake (4 bar)            |                  |                  |                  |             |             |             |                                |                                |                                | 1.00                           | 0.99                           |
| CO <sub>2</sub> uptake (5 bar)            |                  |                  |                  |             |             |             |                                |                                |                                |                                | 1.00                           |
